# Supplementary material for: Counteracting neuroinflammation in experimental Parkinson’s disease favors recovery of function: effects of Er-NPCs administration
Source: PubMed Central journal article supplement (PMC6271641; doi:10.1186/s12974-018-1375-2), 2018-11-30

**A**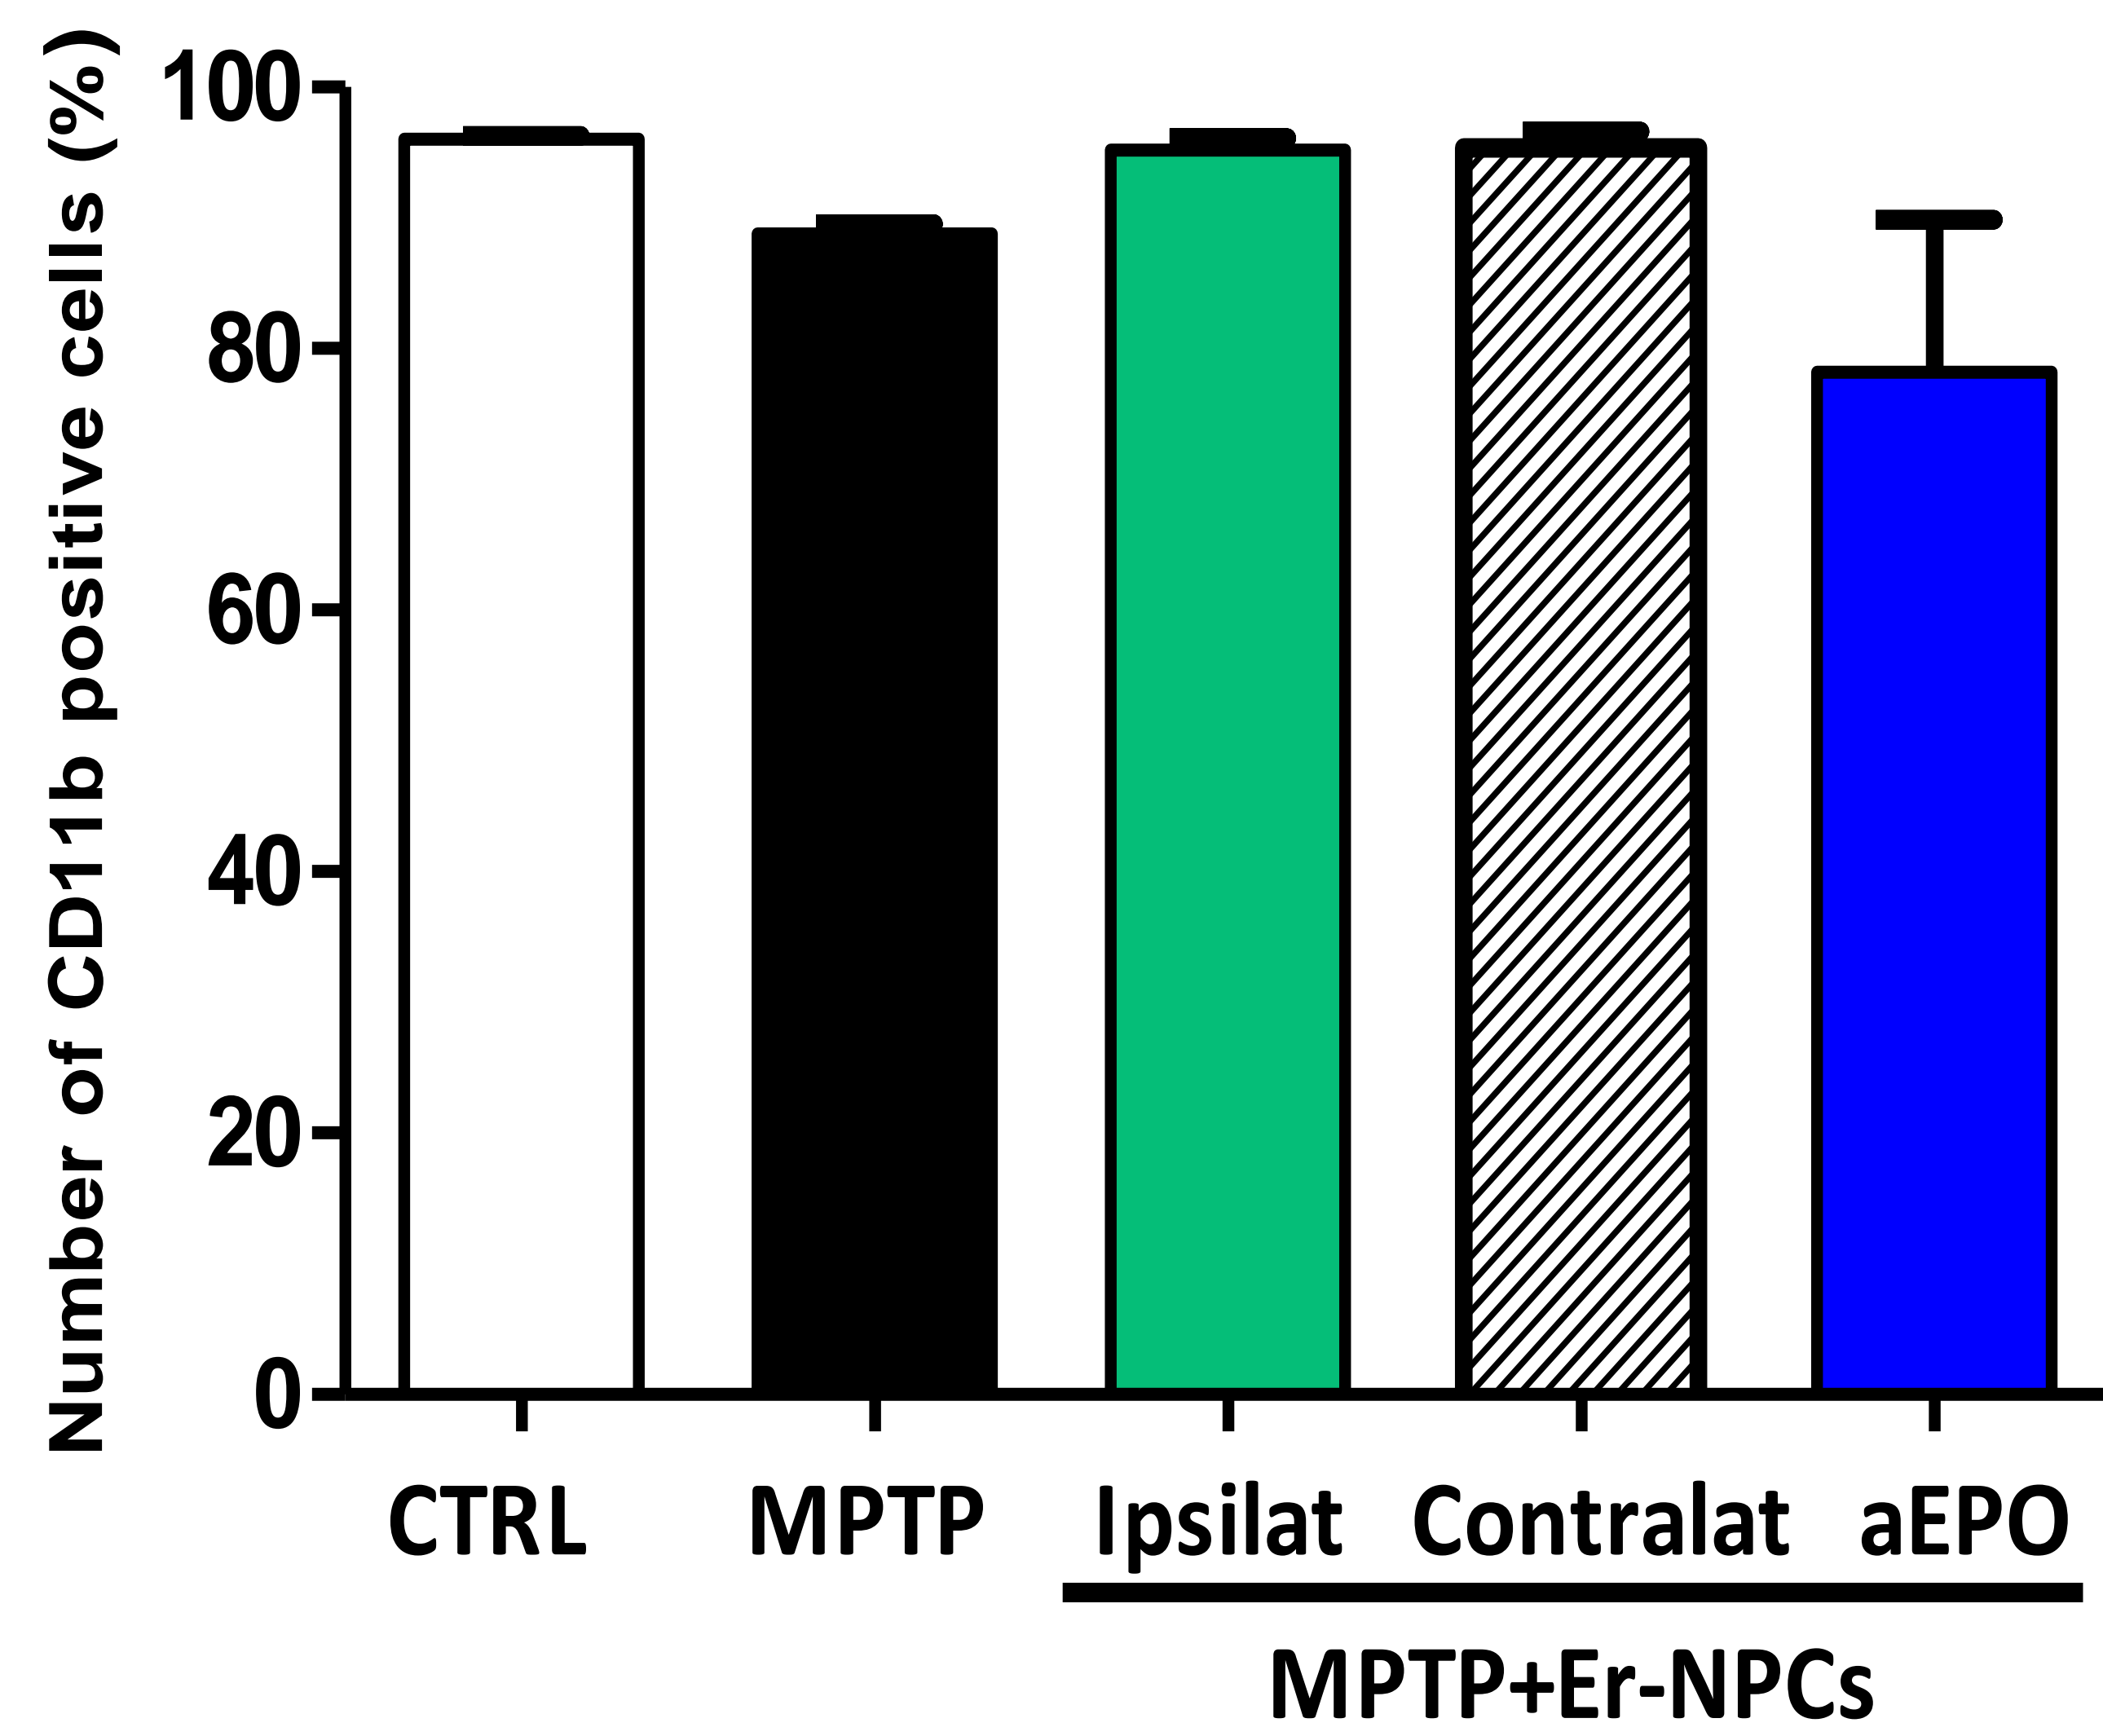**B**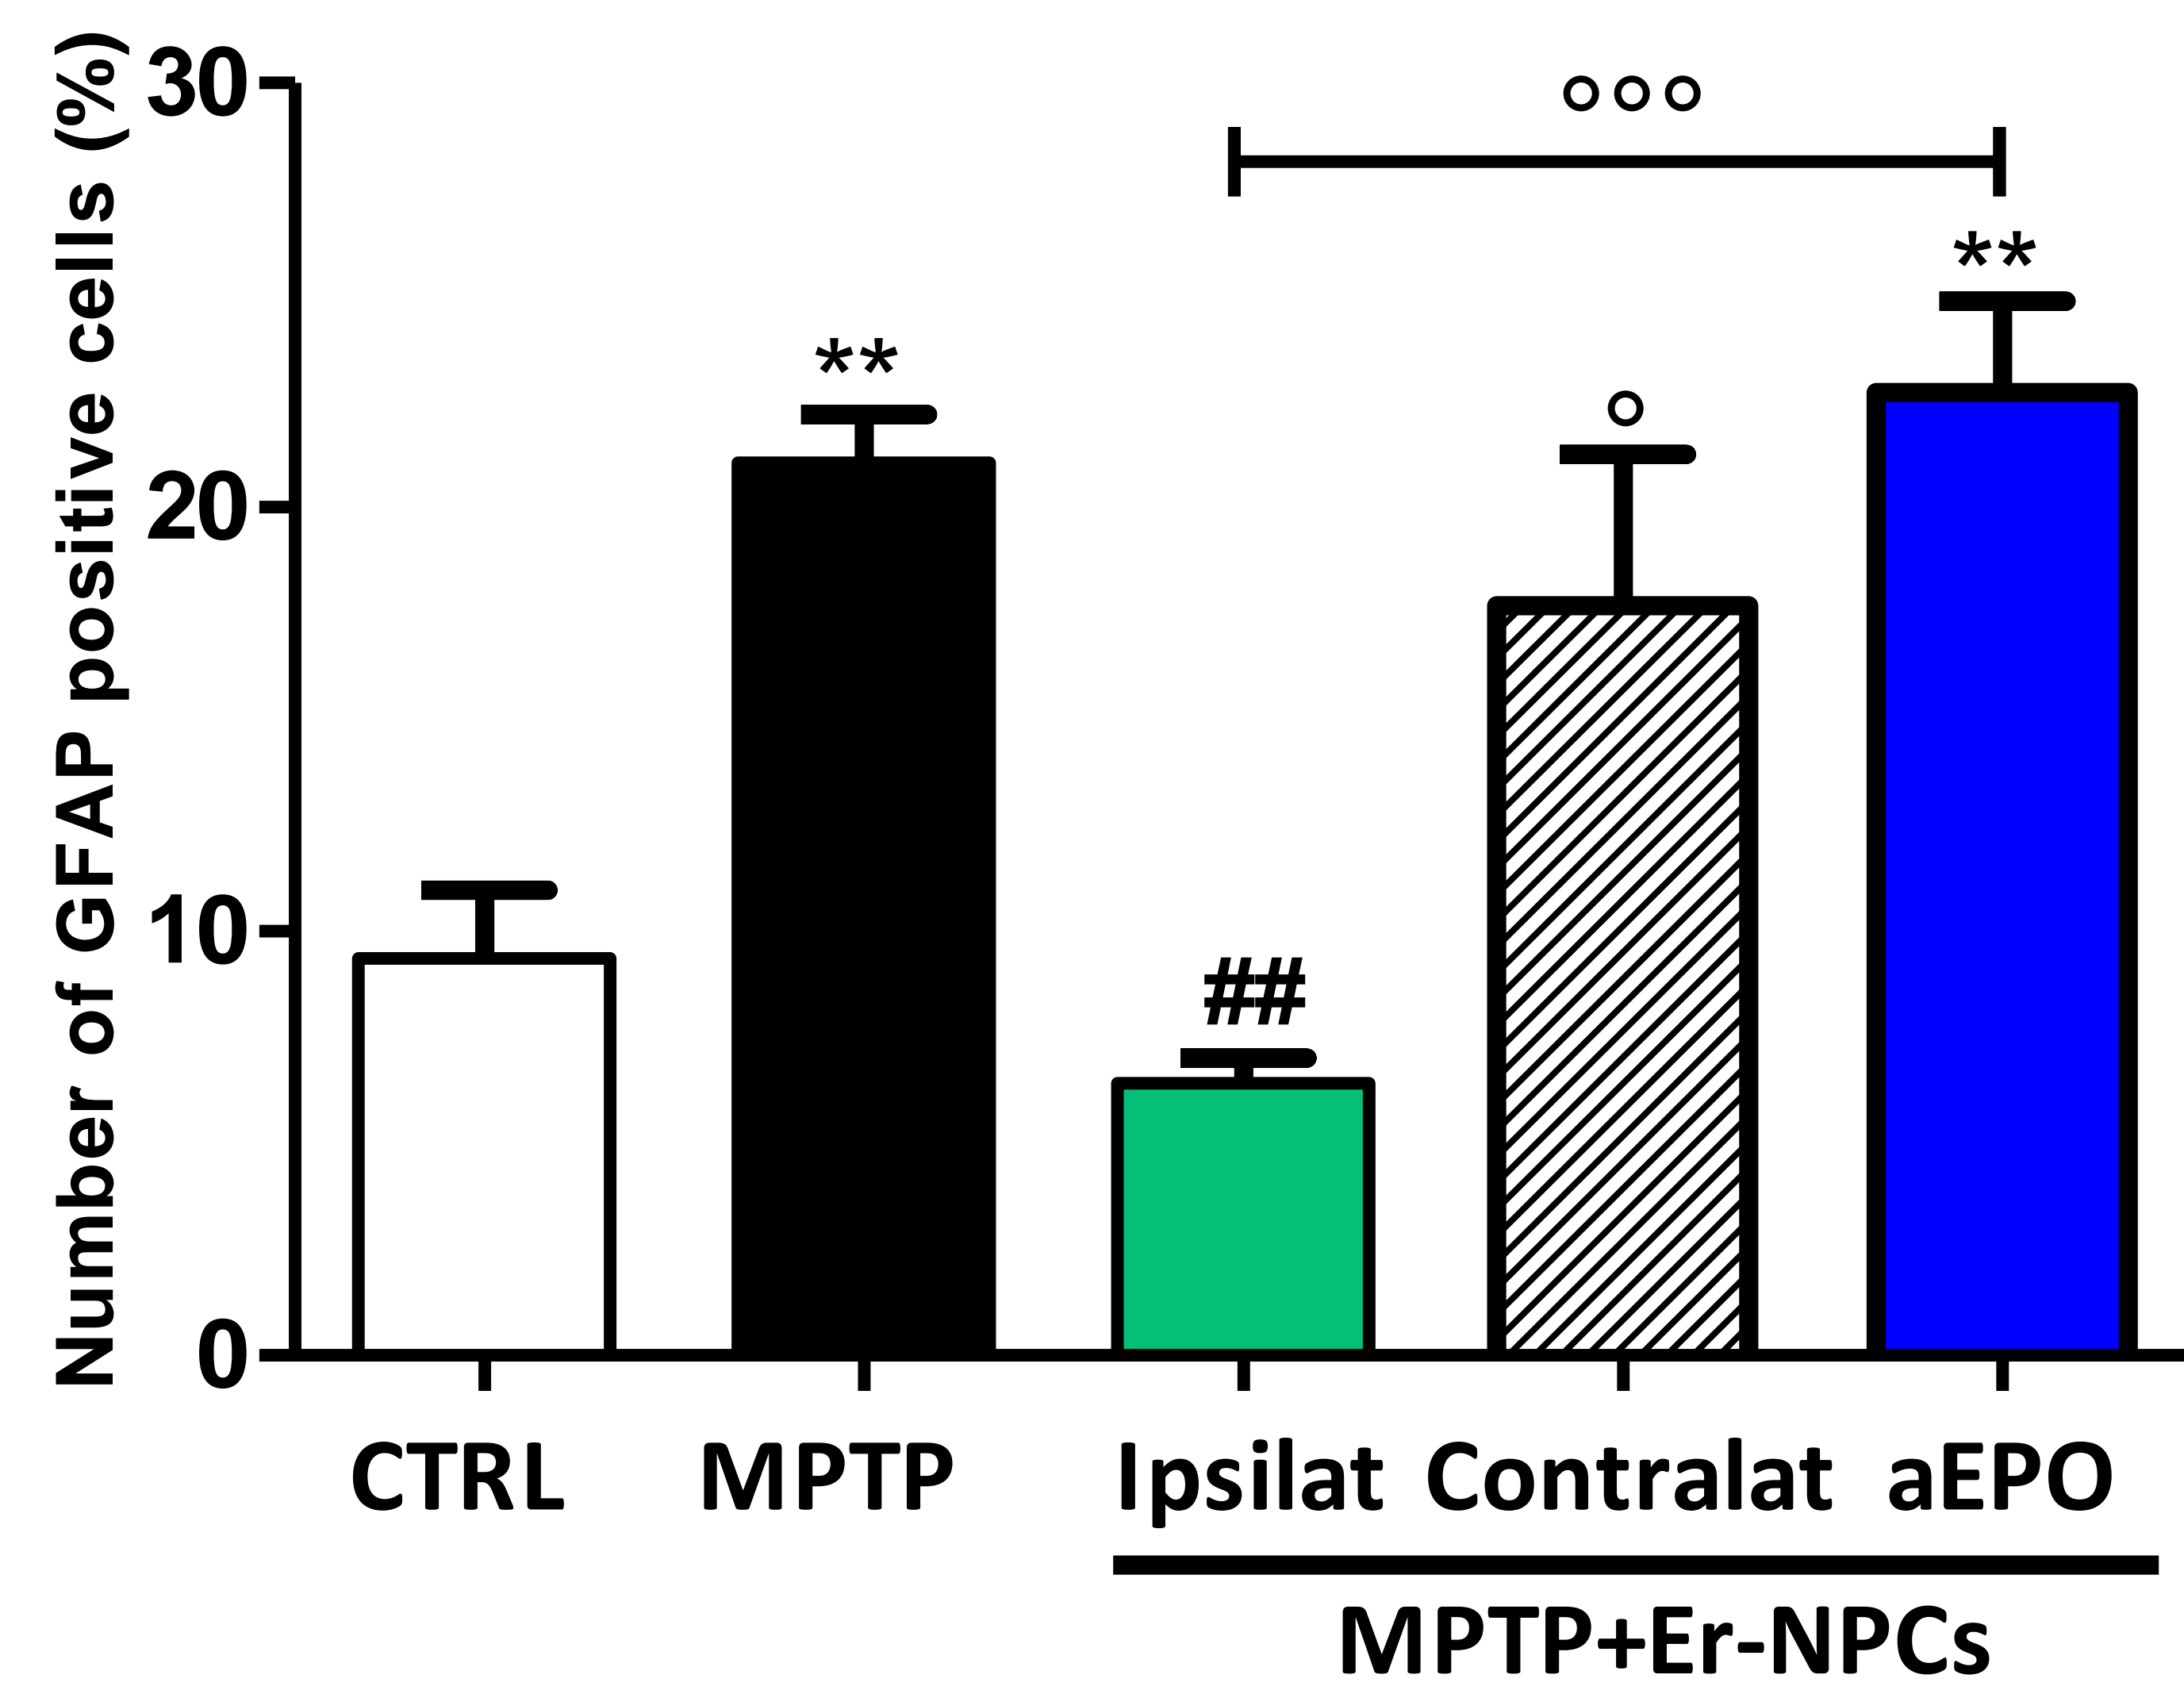**C**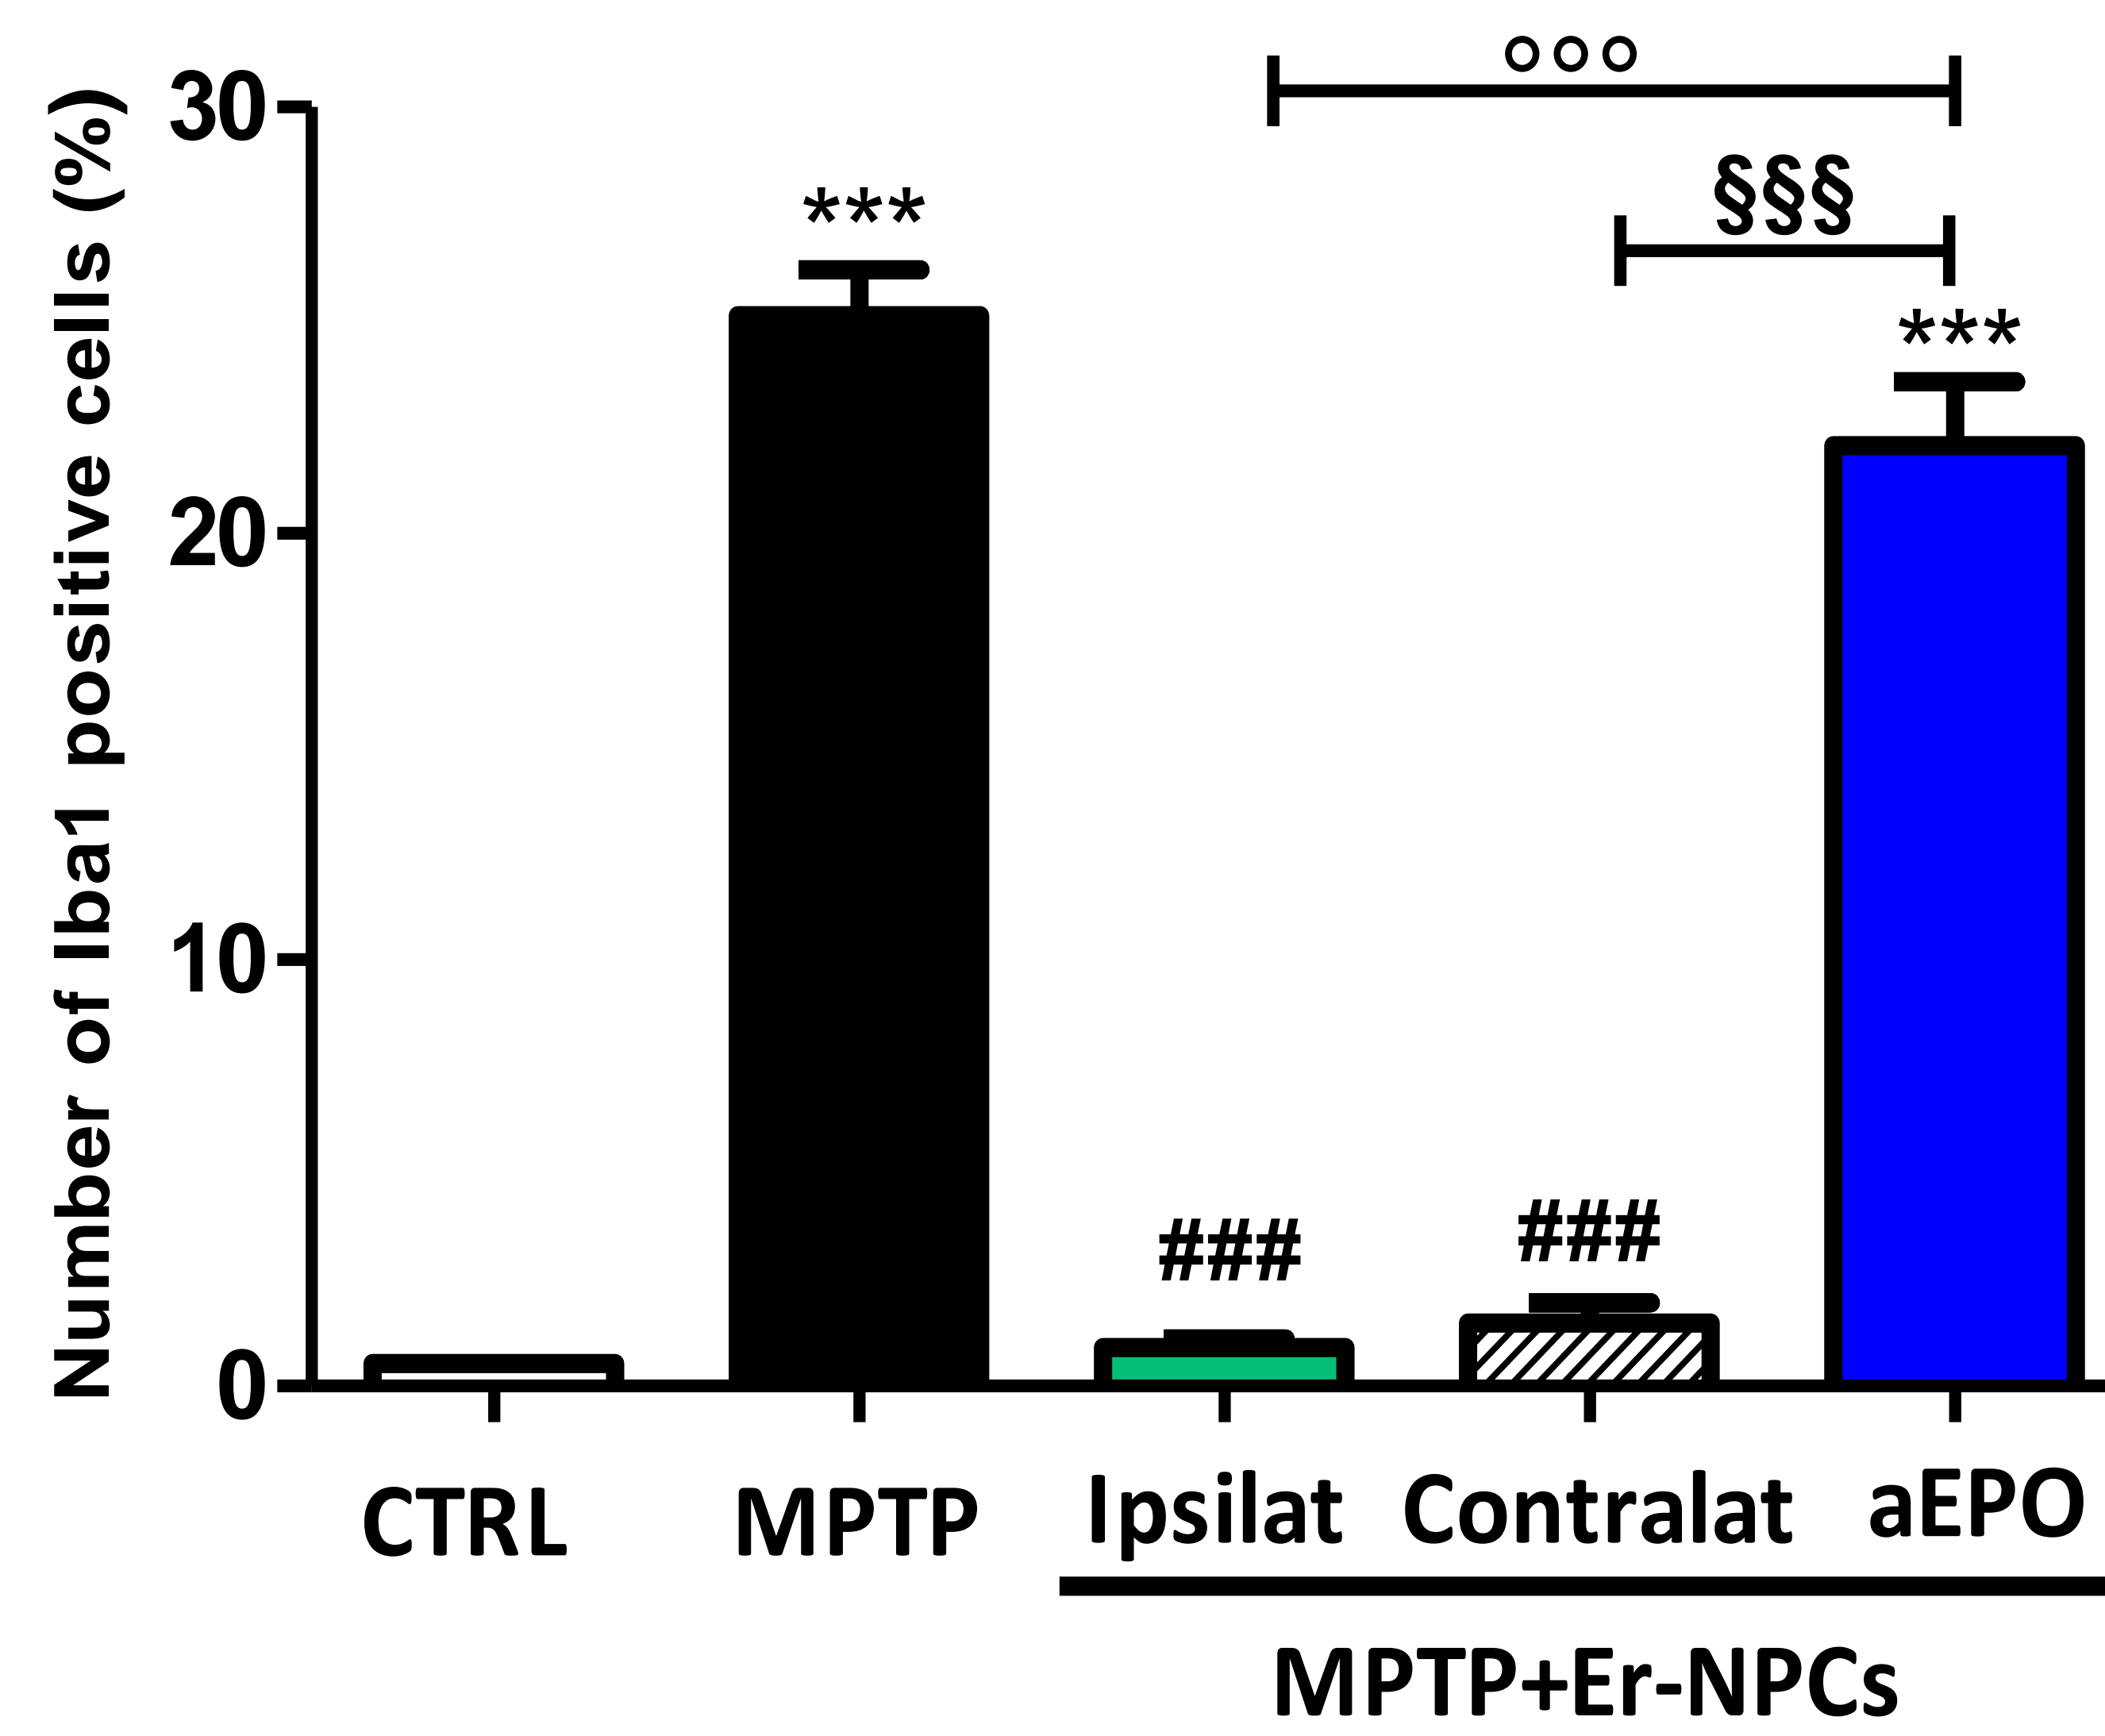

Supplement: 12974_2018_1375_MOESM3_ESM.pdf [file 12974_2018_1375_MOESM3_ESM.pdf]
