# Supplementary material for: Counteracting neuroinflammation in experimental Parkinson’s disease favors recovery of function: effects of Er-NPCs administration
Source: Springer Nature journal article supplement (doi:10.1186/s12974-018-1375-2), 2018-11-30

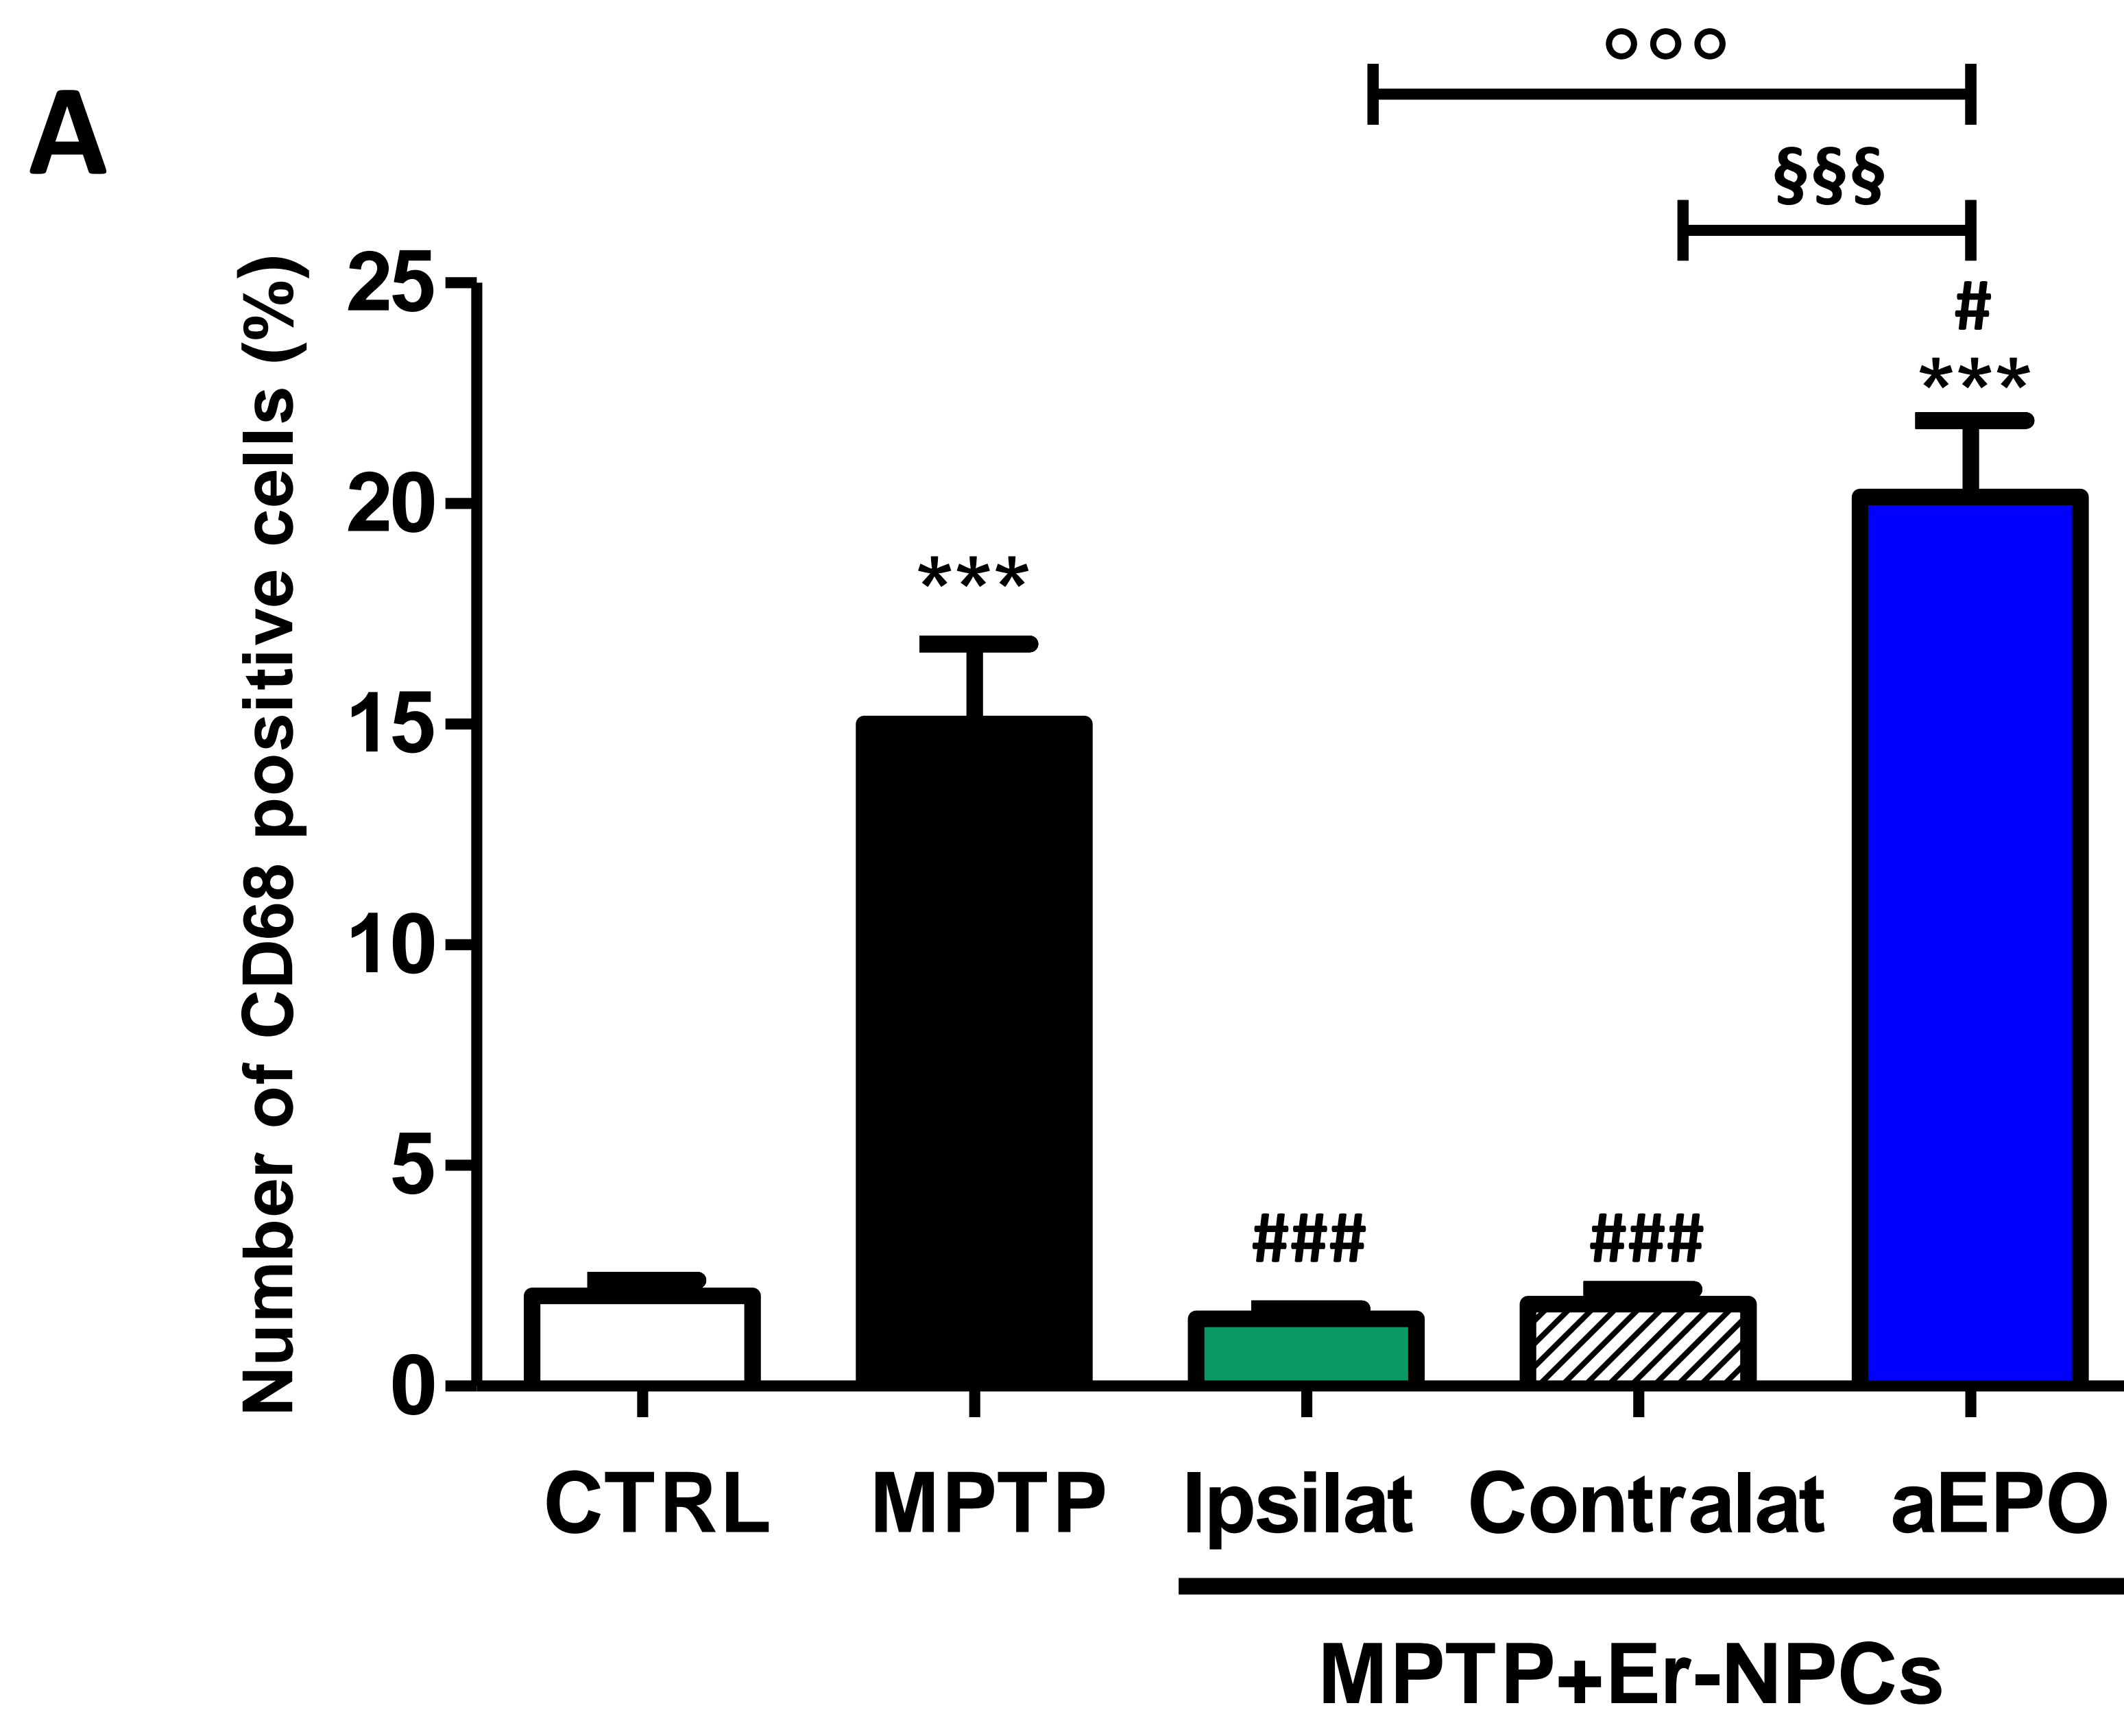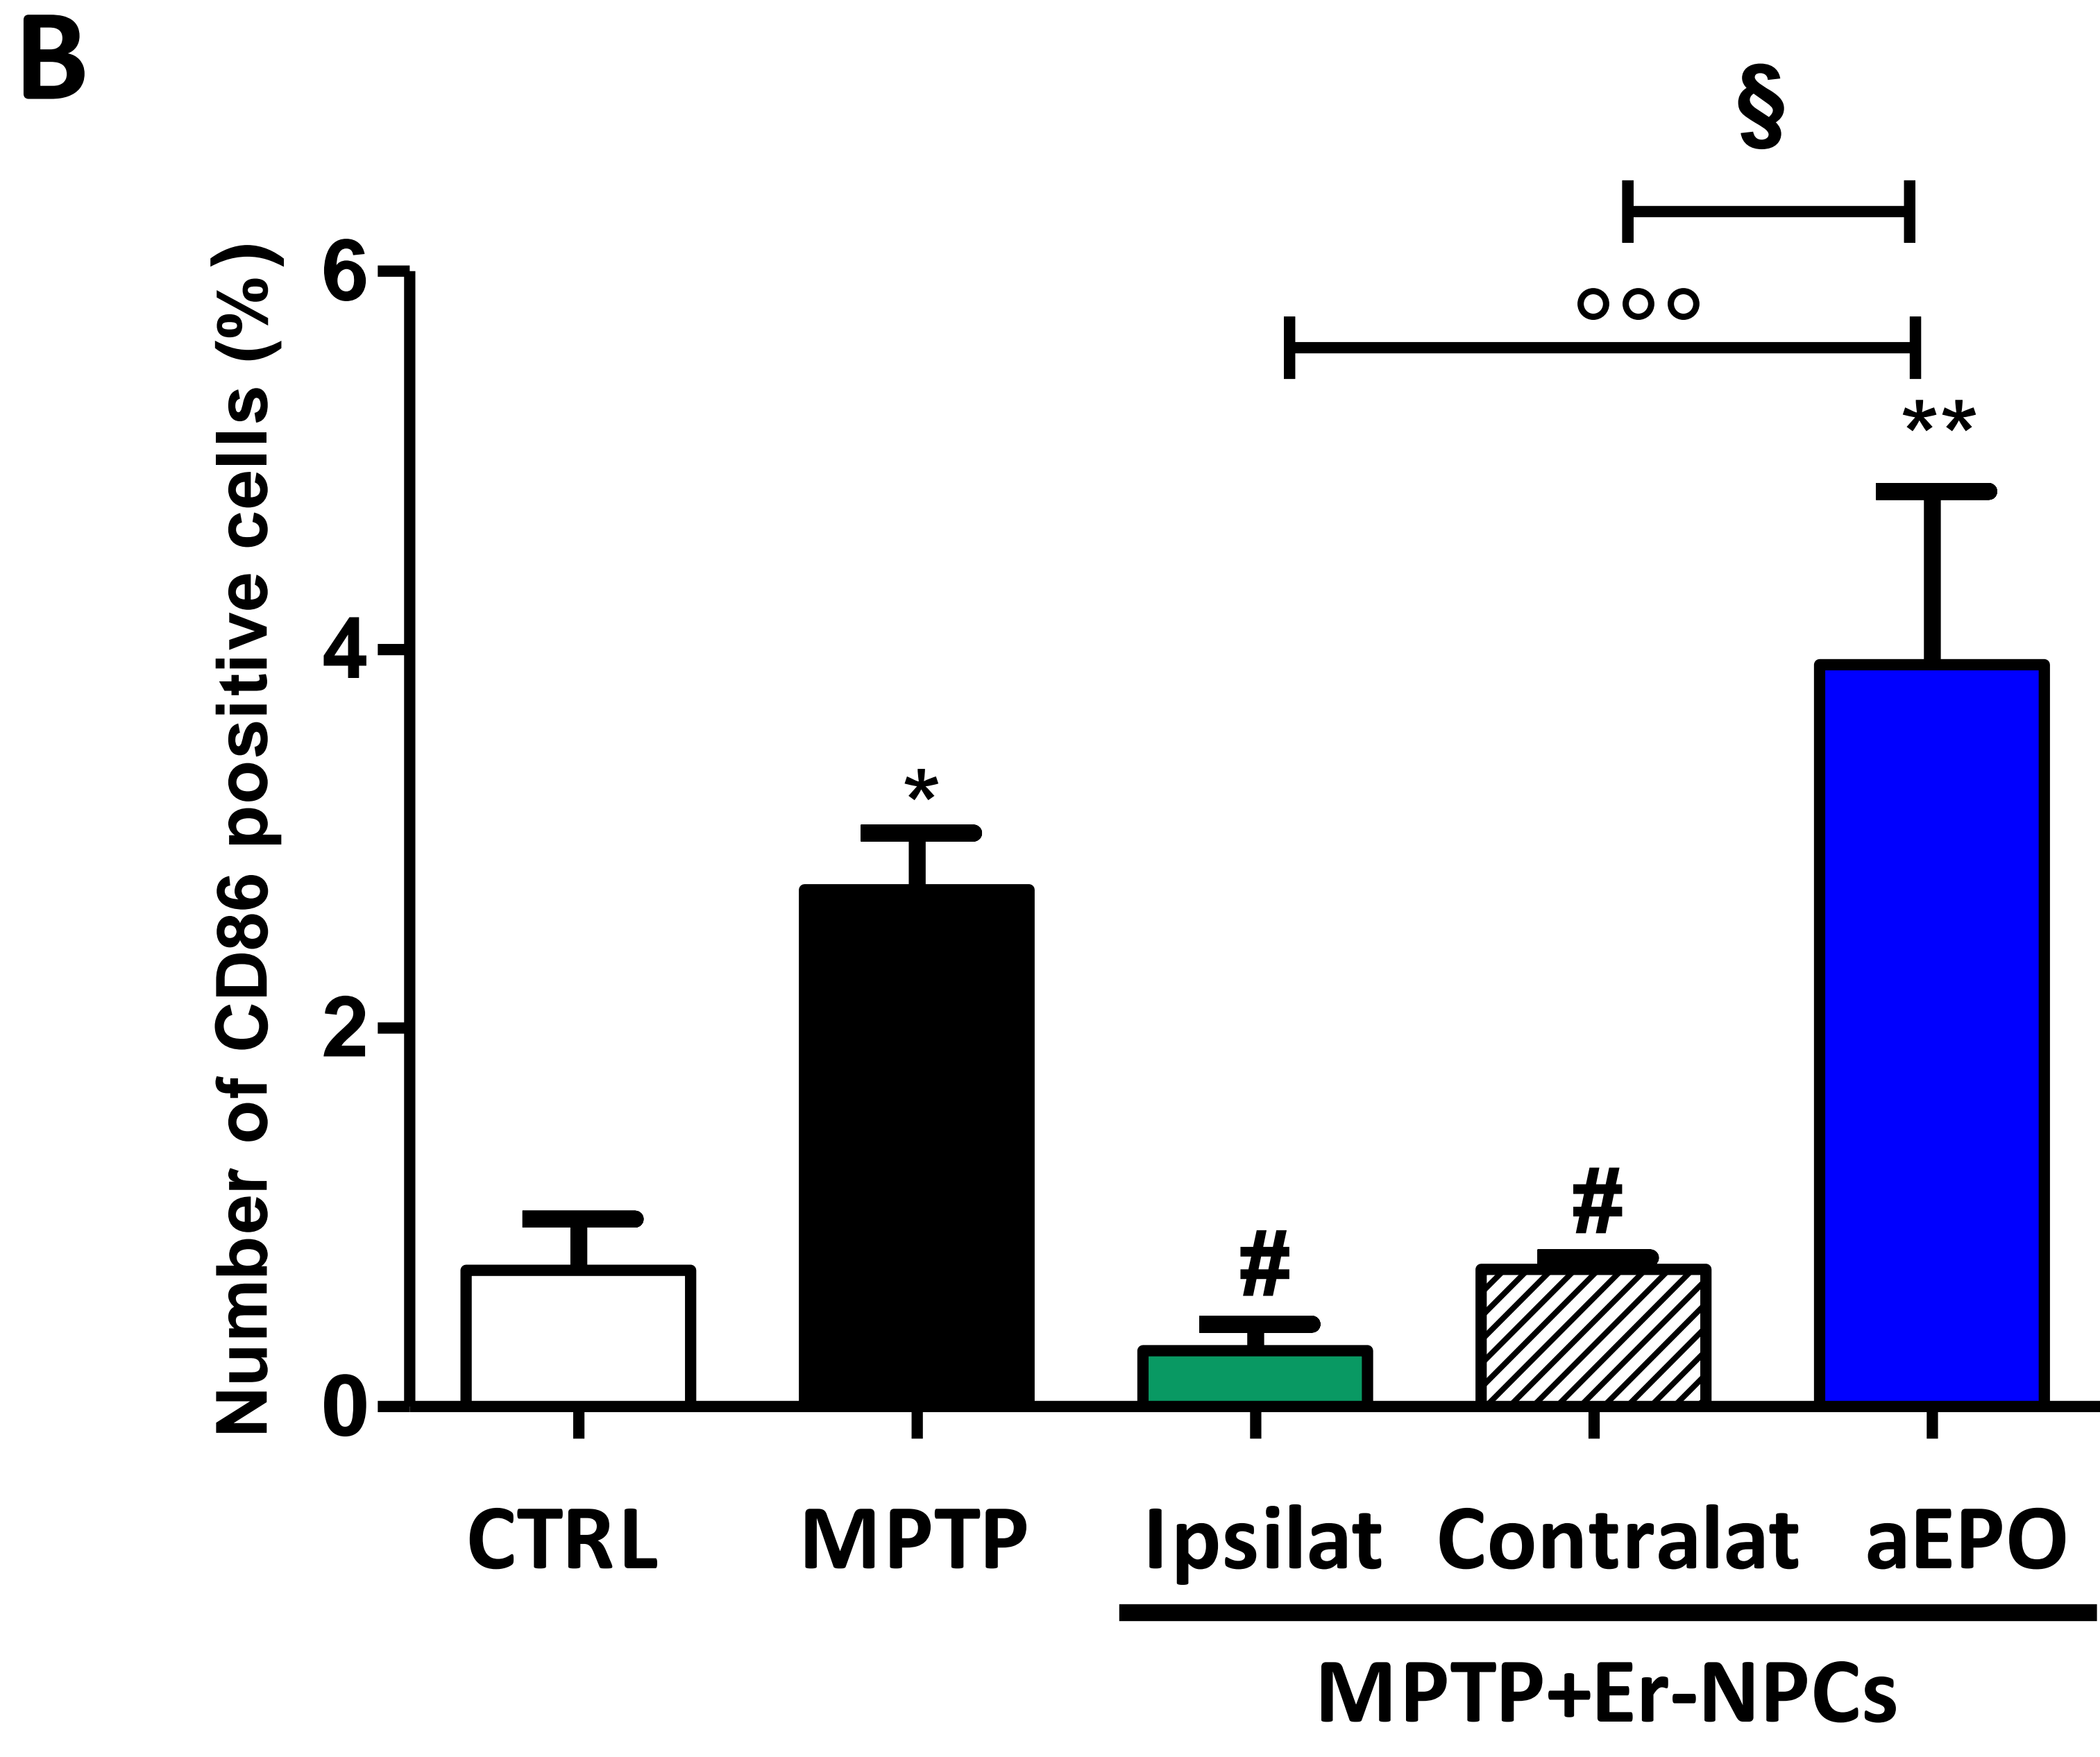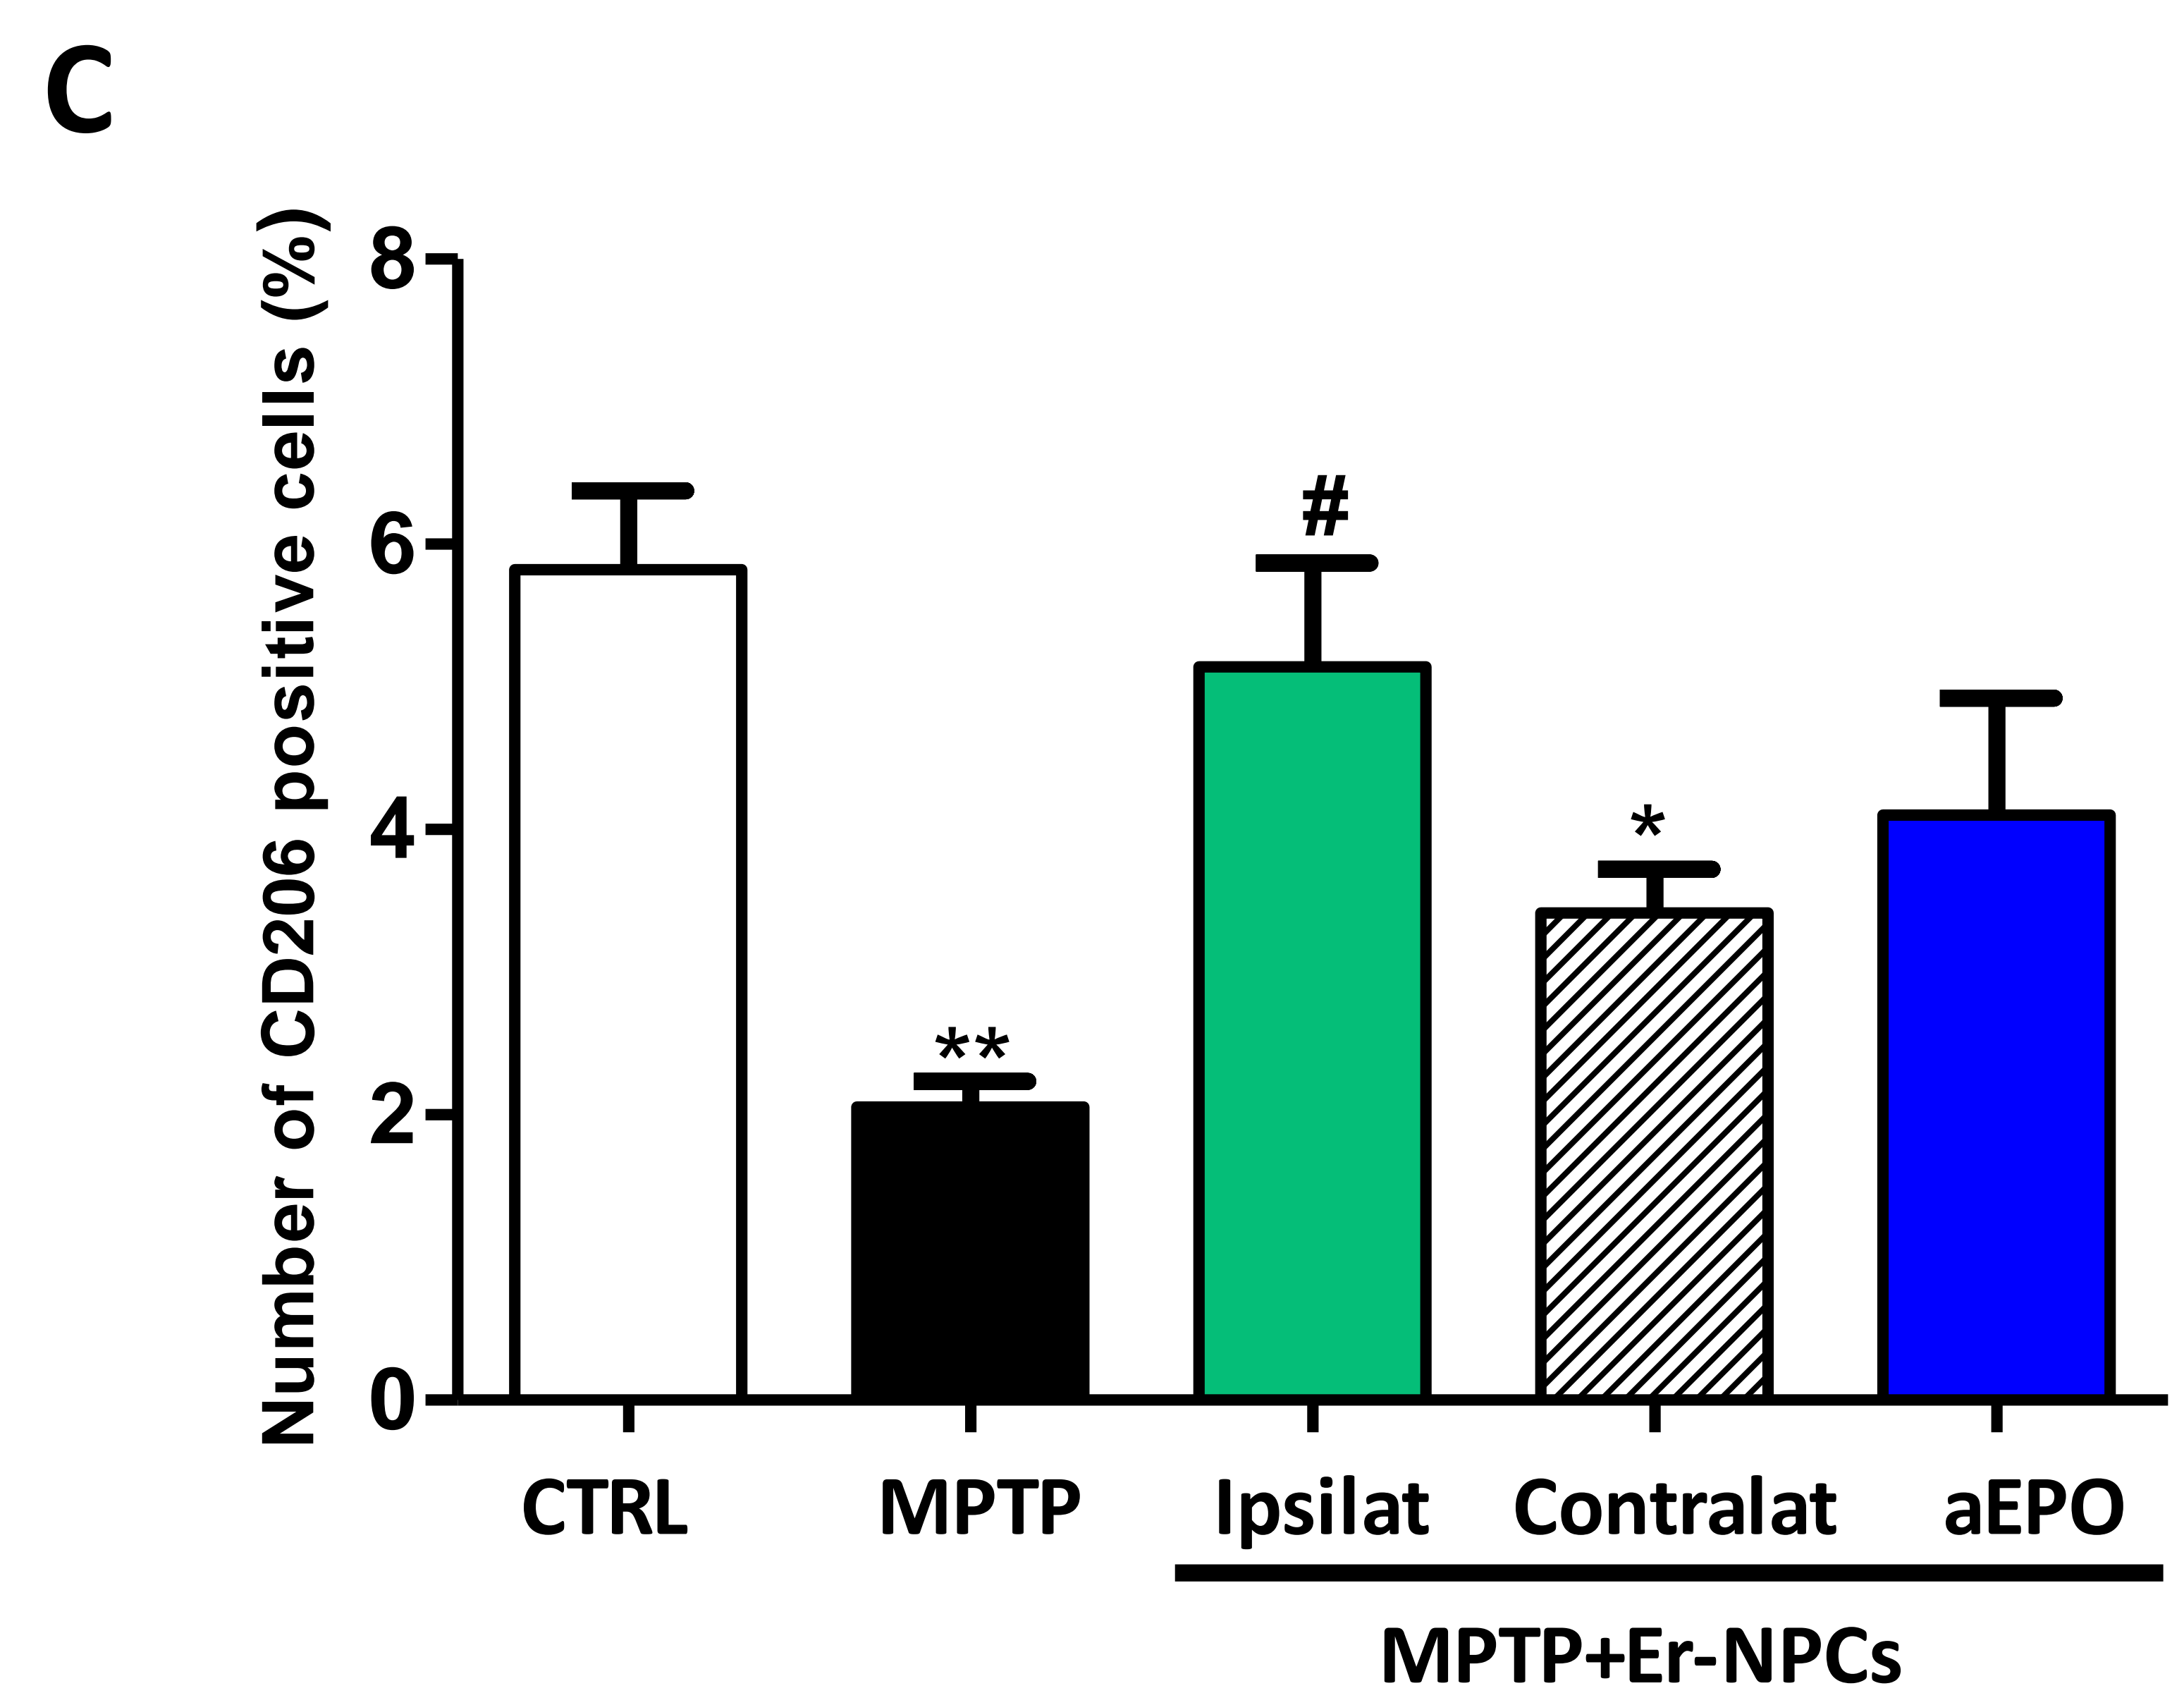

Supplement: MOESM4 [file 16308086]
